# Supplementary material
Source: PubMed Central journal article supplement (PMC3400456)

SUPPLEMENTARY DATA

FIG. S1: NTS sequence alignment with species-specific sequences marked with red box. Abal is used as abbreviation for *A. baldensis*, Asyl for *A. sylvestris*, Acyl for *A. cylindrica*, Avir for *A. virginiana* and Amul for *A. multifida* clones.

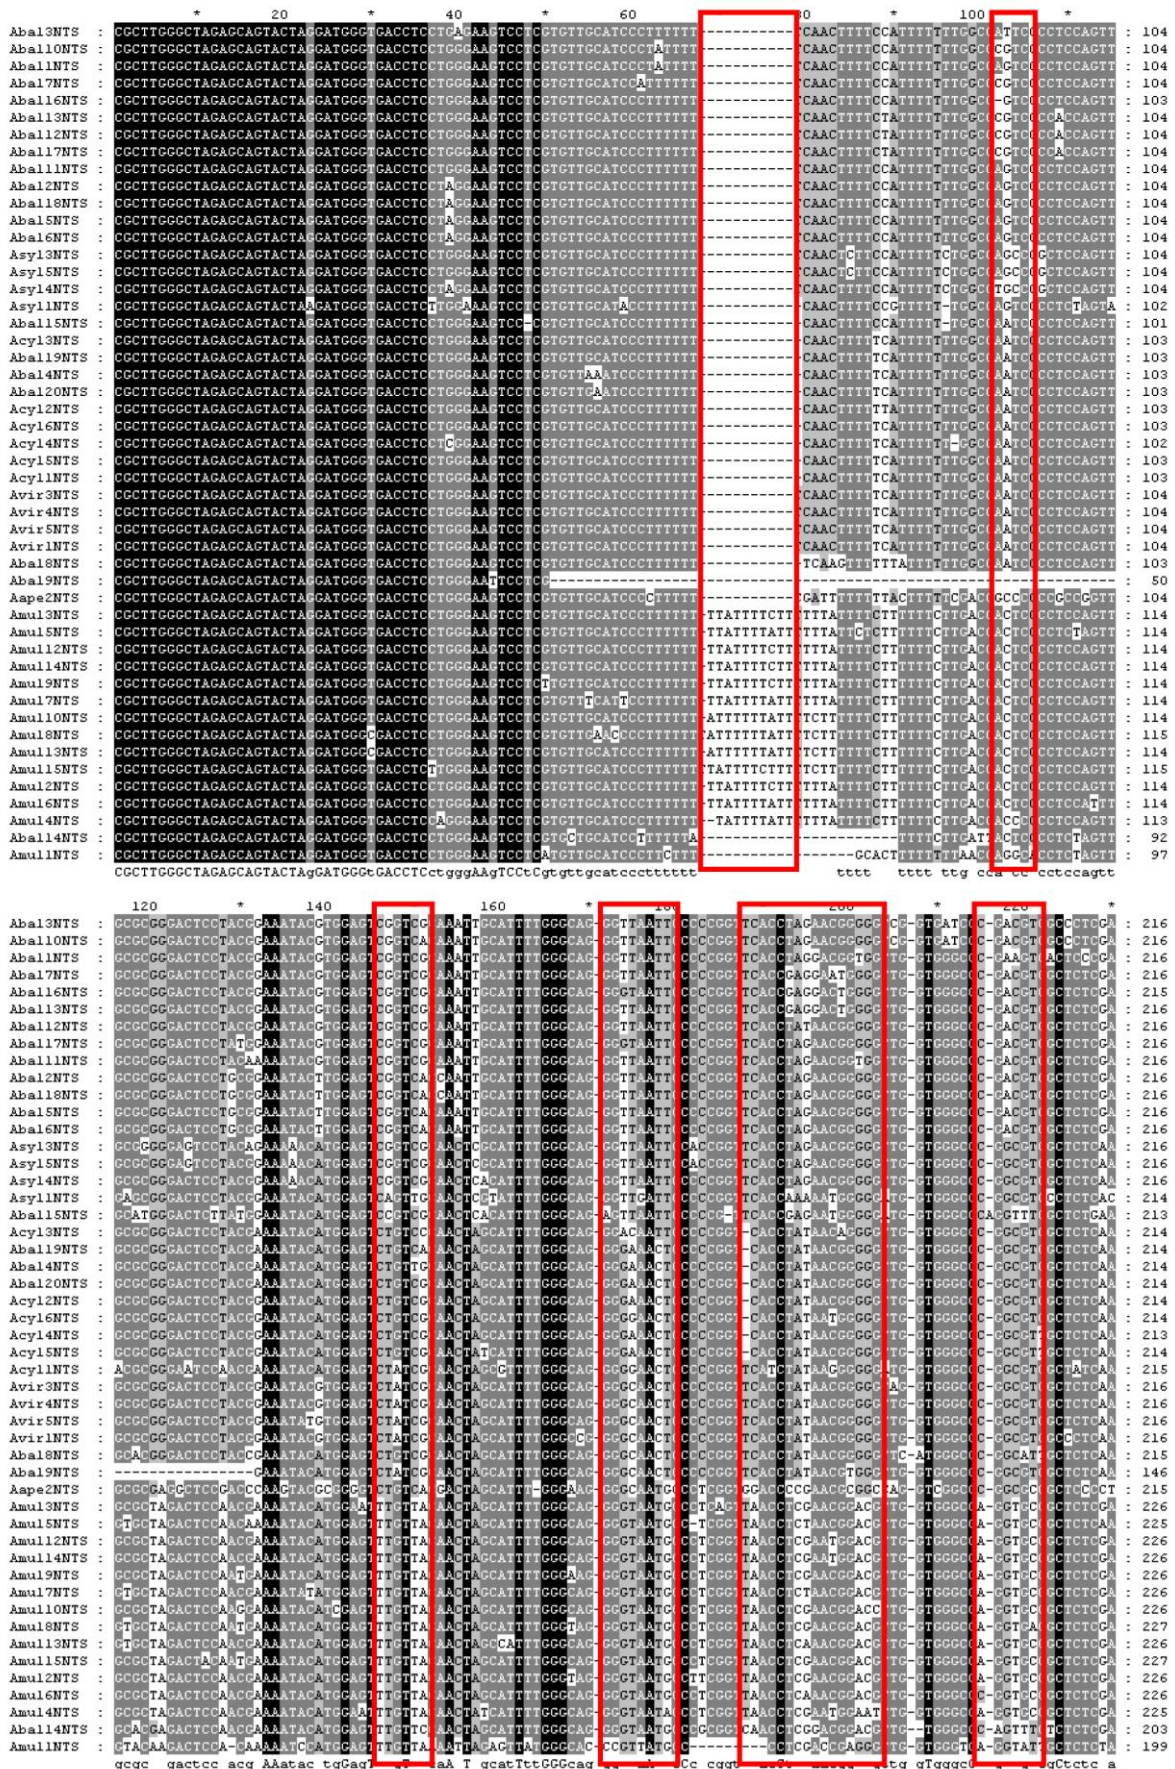

240 \* 260 280 \* 300 \* 320 \* 340
Abal3NTS : GAAGGA...
Abal10NTS : CAAGGA...
Abal11NTS : CAAGGA...
Abal7NTS : GAAGGA...
Abal16NTS : CAAGGA...
Abal13NTS : CAAGGA...
Abal12NTS : CAAGGA...
Abal17NTS : CAAGGA...
Abal11NTS : CAAGGA...
Abal12NTS : GAAGGA...
Abal18NTS : CAAGGA...
Abal5NTS : CAAGGA...
Abal6NTS : CAAGGA...
Asyl3NTS : CAAGGA...
Asyl5NTS : CAAGGA...
Asyl4NTS : CAAGGA...
Asyl11NTS : CAAGGA...
Asyl15NTS : CAAGGA...
Acyl3NTS : CAAGGT...
Abal19NTS : CAAGGT...
Abal4NTS : CAAGGT...
Abal20NTS : CAAGGT...
Acyl2NTS : CAAGGT...
Acyl16NTS : CAAGGT...
Acyl4NTS : CAAGGT...
Acyl5NTS : CAAGGT...
Acyl11NTS : CAAGGT...
Avir3NTS : CAAGGT...
Avir4NTS : CAAGGT...
Avir5NTS : CAAGGT...
Avir11NTS : CAAGGT...
Abal8NTS : CAAGTT...
Abal9NTS : CAAGTT...
Aape2NTS : ATCGAA...
Amul3NTS : CAATAA...
Amul5NTS : CAATAA...
Amul12NTS : CAATAA...
Amul14NTS : CAATAA...
Amul9NTS : CAATAA...
Amul7NTS : CAATAA...
Amul10NTS : CAATAA...
Amul8NTS : CAATAA...
Amul13NTS : CAATAA...
Amul15NTS : CAATAA...
Amul2NTS : CAATAA...
Amul6NTS : CAATAA...
Amul4NTS : CAATAA...
Abal14NTS : CGTAGC...
Amul11NTS : GTTGA...
gaa aAaccgg CAa aGccc tTc ttAAaA...
\* 360 \* 380 \* 400 \* 420 \* 440 \* 460
Abal3NTS : CTCGGC...
Abal10NTS : CTCGGC...
Abal11NTS : CTCGGC...
Abal7NTS : CTCGGC...
Abal16NTS : CTCGGC...
Abal13NTS : CTCGGC...
Abal12NTS : CTCGGC...
Abal17NTS : CTCGGC...
Abal11NTS : CTCGGC...
Abal12NTS : CTCGGC...
Abal18NTS : CTCGGC...
Abal5NTS : CTCGGC...
Abal6NTS : CTCGGC...
Asyl3NTS : CTCGGC...
Asyl5NTS : CTCGGC...
Asyl4NTS : CTCGGC...
Asyl11NTS : CTCGGC...
Avir3NTS : CTCGGC...
Avir4NTS : CTCGGC...
Avir5NTS : CTCGGC...
Avir11NTS : CTCGGC...
Abal8NTS : CTCGGC...
Abal9NTS : CTCGGC...
Aape2NTS : CTCGGC...
Amul3NTS : CTCGGC...
Amul5NTS : CTCGGC...
Amul12NTS : CTCGGC...
Amul14NTS : CTCGGC...
Amul9NTS : CTCGGC...
Amul7NTS : CTCGGC...
Amul10NTS : CTCGGC...
Amul8NTS : CTCGGC...
Amul13NTS : CTCGGC...
Amul15NTS : CTCGGC...
Amul2NTS : CTCGGC...
Amul6NTS : CTCGGC...
Amul4NTS : CTCGGC...
Abal14NTS : CTCGGC...
Amul11NTS : CTCGGC...
CgcgGagcAtaCgAATccAA cgCC CggccTcCtAAGTTTCAGctacGgTtCGA GAtagagCc TTTccgTgGACt Gg c AAa tGAAa GgAA...
\* 480 \* 500 \* 520 \* 540 \* 560 \* 580 \* 600



FIG. S2. GISH on partial metaphase plate of *A. baldensis* with labelled genomic DNA of *A. multifida* (in red). Bar = 10  $\mu$ m.

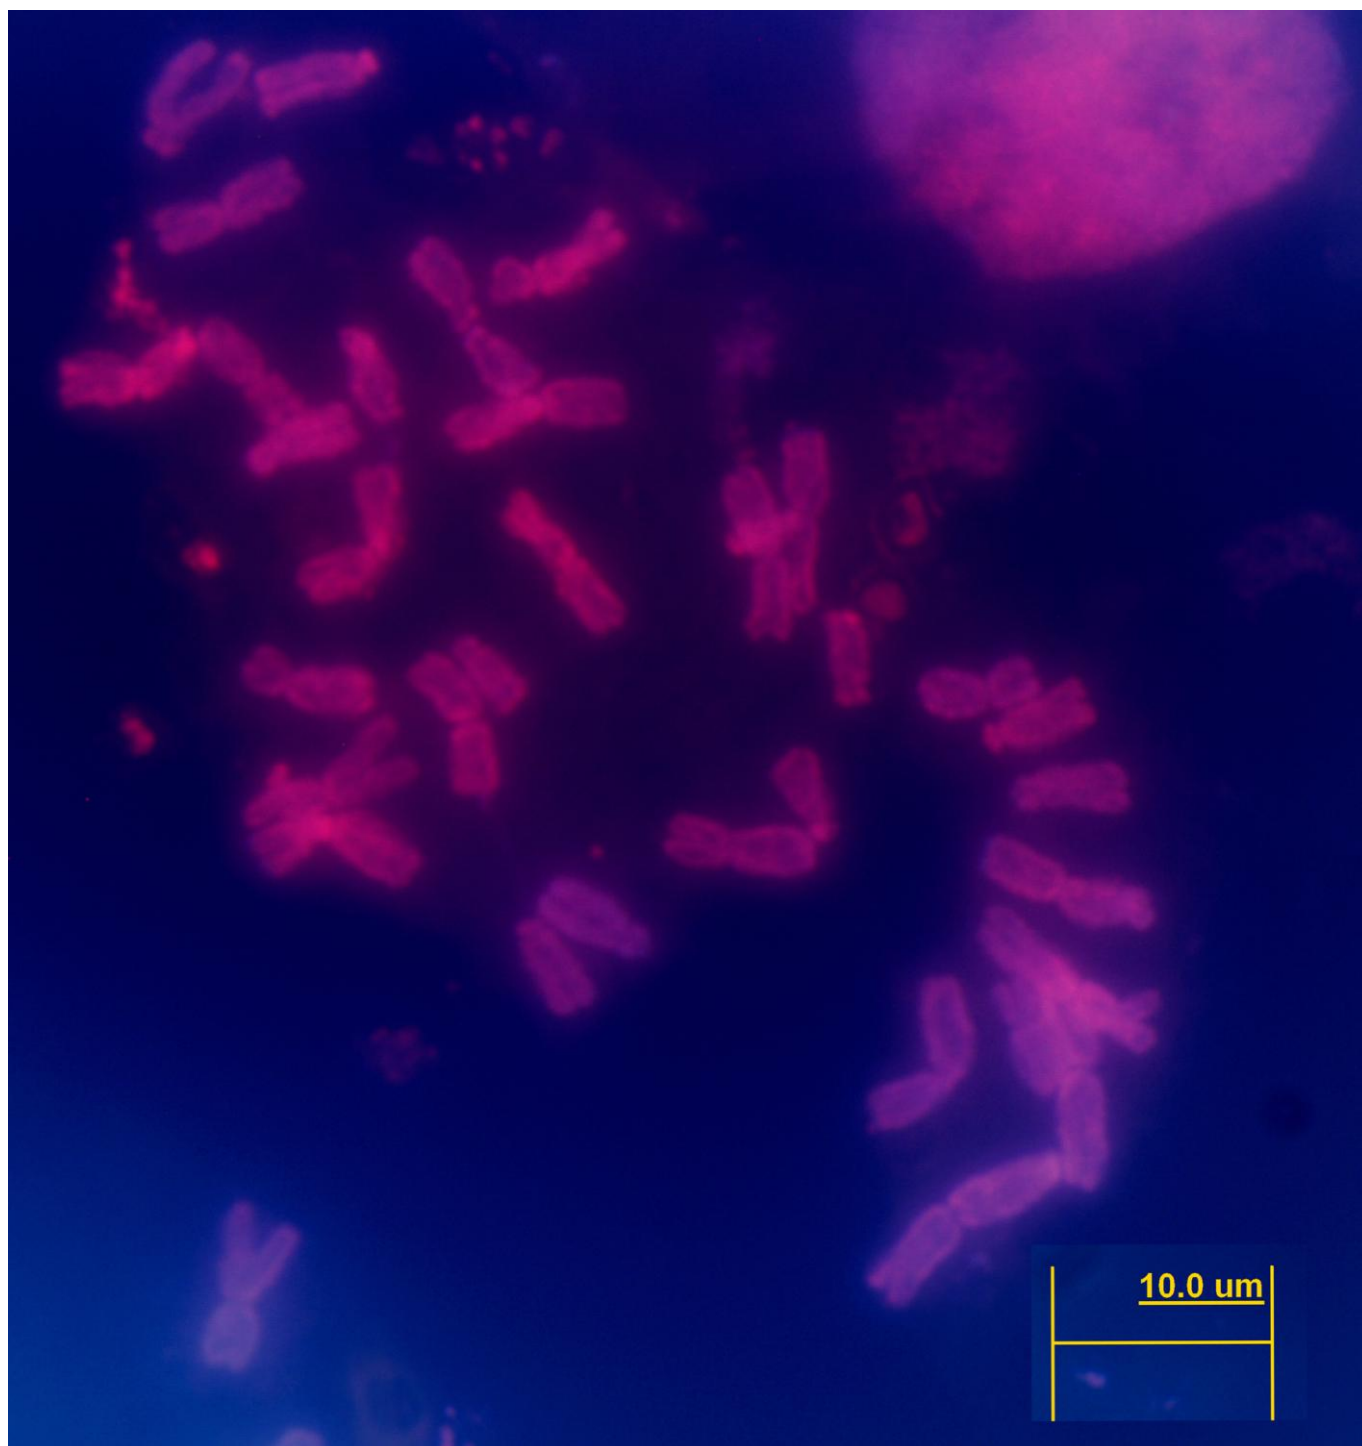

FIG. S3. Achene fruits and leaves of *Anemone* species, except *A. virginiana* where a bud is shown.

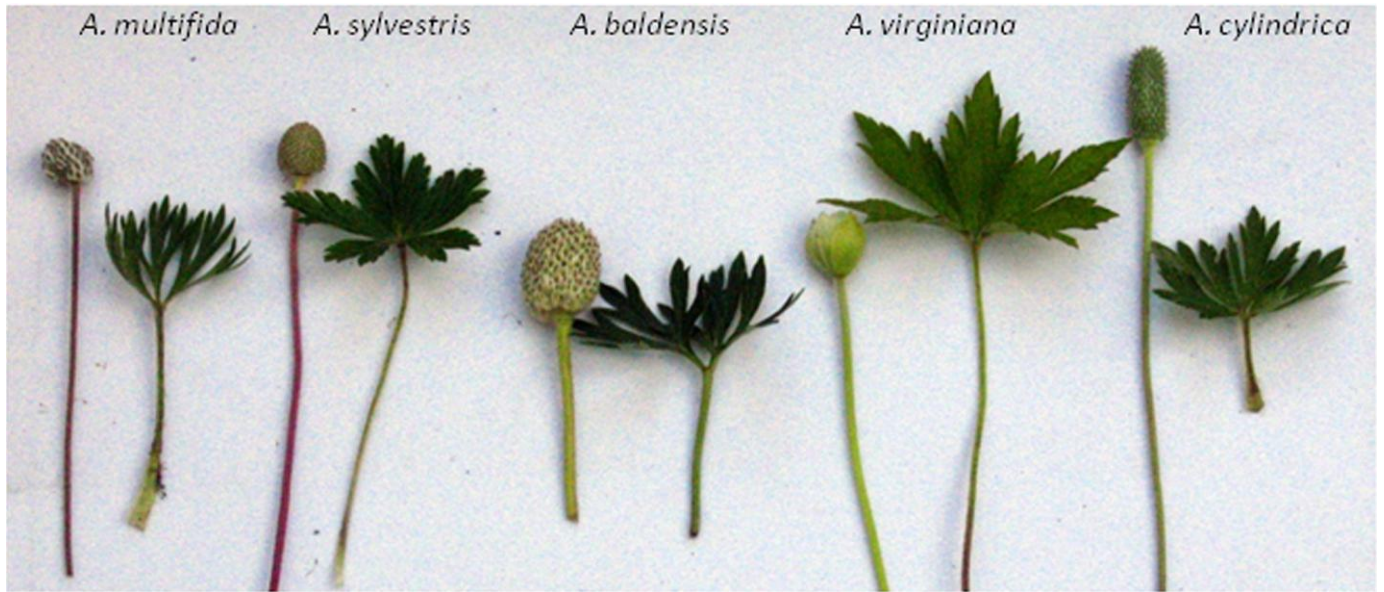

Supplement: supp_mcs128_mcs128suppl.pdf [file supp_mcs128_mcs128suppl.pdf]
